# Supplementary material
Source: PubMed Central journal article supplement (PMC4037389)
Supplement: NIHMS545344-supplement-10653_2013_9586_MOESM1_ESM.pdf [file NIHMS545344-supplement-10653_2013_9586_MOESM1_ESM.pdf]

## Electronic Supplementary Material

### Article: Lead in New York City Community Garden Chicken Eggs: Influential Factors and Health Implications

Journal: Environmental Geochemistry and Health

Authors: Henry M. Spliethoff <sup>a,\*</sup>, Rebecca G. Mitchell <sup>a</sup>, Lisa N. Ribaldo <sup>a</sup>, Owen Taylor <sup>b</sup>, Hannah A. Shayler <sup>c</sup>, Virginia Greene <sup>d</sup>, Debra Oglesby <sup>d</sup>

<sup>a</sup> Bureau of Toxic Substance Assessment, New York State Department of Health, Empire State Plaza, Corning Tower, Room 1743, Albany, New York, 12237

<sup>b</sup> Just Food, 1155 Avenue of the Americas, 3rd Floor, New York, New York, 10036

<sup>c</sup> Cornell Waste Management Institute, Department of Crop and Soil Sciences, Cornell University, Bradfield Hall, Ithaca, New York, 14853

<sup>d</sup> New York State Department of Agriculture and Markets, 7 Harriman Campus Road, Albany, New York, 12206

\* Corresponding author email: hms01@health.state.ny.us; phone (518) 402 7820; fax (518) 402-7819

#### **Contents:**

**Table S1** Henhouse characteristics and management practices and analytical results for 9 NYC henhouses and 1 rural henhouse

**Table S2** Lead concentrations in chicken run soil samples (mg/kg) measured by ICP-AES and XRF. Results are strongly correlated ( $R = 0.992$ ).

**Table S3** Correlations between measures of lead in eggs and potentially influential variables for 10 henhouses (Spearman coefficients and p values)

**Table S4** Measures of lead in eggs for 10 henhouses grouped by dichotomous variables (Median, Range, and Mann-Whitney p-values)

**Table S5** Regression coefficients, p-values, and goodness-of-fit statistics

**Table S6** Predicted fraction of eggs with lead detected (FPbEgg) and maximum lead concentration (PbEggMax) in eggs from a henhouse at three different soil concentrations

**Table S1** Henhouse characteristics and management practices and analytical results for 9 NYC henhouses and 1 rural henhouse

| Characteristics and Practices                                                       | NYC Henhouses |      |      |      |      |      |      |        |       | Rural Hen-House |
|-------------------------------------------------------------------------------------|---------------|------|------|------|------|------|------|--------|-------|-----------------|
|                                                                                     | 1             | 2    | 3    | 4    | 5    | 6    | 7    | 8      | 9     |                 |
| Number of Chickens                                                                  | 16            | 123  | 147  | 20   | 28   | 19   | 7    | 5      | 36    | 7               |
| Number of Laying Hens                                                               | 16            | 123  | 147  | 20   | 20   | 19   | 7    | 3      | 36    | 2               |
| Number of Chicken Breeds                                                            | 2             | 1    | 5    | 4    | 4    | 5    | 3    | 4      | 6     | 2               |
| Average Chicken Residence Time in Garden (months)                                   | 18            | 9    | 9    | 5    | 11   | 34   | 12   | 36     | 20    | 36              |
| Average Number of Eggs per Laying Hen per Day                                       | 0.7           | 0.7  | 0.7  | 0.7  | 0.1  | 0.3  | 0.9  | 0.3    | 0.3   | 0.4             |
| Run Area (m <sup>2</sup> )                                                          | 9             | 692  | 286  | 9    | 9    | 10   | 6    | 3      | 7     | 49              |
| Run Area per Chicken (m <sup>2</sup> )                                              | 0.6           | 5.6  | 1.9  | 0.4  | 0.3  | 0.5  | 0.8  | 0.7    | 0.2   | 6.9             |
| Run Cover Material - Fraction of Run Covered by                                     |               |      |      |      |      |      |      |        |       |                 |
| Bare Soil                                                                           | 90%           | 0%   | 0%   | 90%  | 95%  | 40%  | 100% | 100%   | 15%   | 100%            |
| Grass                                                                               | 0%            | 100% | 100% | 0%   | 0%   | 0%   | 0%   | 0%     | 0%    | 0%              |
| Mulch (e.g., bark, straw, coffee chaff)                                             | 10%           | 0%   | 0%   | 10%  | 5%   | 60%  | 0%   | 0%     | 85%   | 0%              |
| Fraction of time chickens have access to areas outside of henhouse and enclosed run | 1%            | 0%   | 0%   | 1%   | 0%   | 50%  | 1%   | 4%     | 42%   | 0%              |
| Diet - Fraction from                                                                |               |      |      |      |      |      |      |        |       |                 |
| Commercial Layer Feed                                                               | 75%           | 84%  | 84%  | 75%  | 60%  | 20%  | 90%  | 80%    | 75%   | 90%             |
| Food Scraps                                                                         | 25%           | 15%  | 15%  | 25%  | 30%  | 20%  | 5%   | 5%     | 15%   | 0%              |
| Other (e.g. corn, grain, seed)                                                      | 0%            | 1%   | 1%   | 0%   | 10%  | 0%   | 0%   | 15%    | 10%   | 10%             |
| <b>Analytical Results</b>                                                           |               |      |      |      |      |      |      |        |       |                 |
| Number of Eggs Analyzed                                                             | 3             | 6    | 6    | 6    | 7    | 10   | 6    | 6      | 8     | 6               |
| Fraction of Eggs with Lead Detected (F <sub>PbEgg</sub> )                           | 0%            | 17%  | 33%  | 0%   | 14%  | 60%  | 100% | 83%    | 88%   | 0%              |
| Number of Chicken-Area Soil Samples Analyzed                                        | 2             | 1    | 1    | 2    | 1    | 1    | 3    | 3      | 2     | 1               |
| Lead Concentration in                                                               |               |      |      |      |      |      |      |        |       |                 |
| Eggs (µg/kg)                                                                        |               |      |      |      |      |      |      |        |       |                 |
| Minimum Egg from Henhouse                                                           | < 10          | < 10 | < 10 | < 10 | < 10 | < 10 | 17.9 | < 10   | < 10  | < 10            |
| Median Egg from Henhouse                                                            | < 10          | < 10 | < 10 | < 10 | < 10 | 13.6 | 39.8 | 19.4   | 18.9  | < 10            |
| Mean Egg from Henhouse <sup>a</sup>                                                 | < 10          | 6.6  | 7.7  | < 10 | 7.9  | 19.6 | 37.2 | 20.2   | 35.1  | < 10            |
| Maximum Egg from Henhouse (Pb <sub>EggMax</sub> )                                   | < 10          | 14.7 | 16.1 | < 10 | 25.5 | 73.2 | 58.8 | 42.1   | 167.0 | < 10            |
| Soil (mg/kg)                                                                        |               |      |      |      |      |      |      |        |       |                 |
| Chicken Run (Pb <sub>SoilRun</sub> )                                                | 20            | 51   | 57   | 64   | 71   | 103  | 241  | 351    | 192   | 15              |
| Maximum for all Chicken Areas (Pb <sub>SoilMax</sub> )                              | 60            | 51   | 57   | 94   | 71   | 103  | 465  | 447    | 631   | 15              |
| Exposure-Weighted (Pb <sub>SoilExp</sub> )                                          | 21            | 51   | 57   | 65   | 71   | 92   | 242  | 352    | 558   | 15              |
| Water (µg/L)                                                                        | < 5           | < 5  | < 5  | < 5  | < 5  | < 5  | < 5  | < 5    | < 5   | < 5             |
| Layer Feed <sup>b</sup> (µg/kg)                                                     | 123           | 168  | 168  | 123  | 187  | 128  | 128  | 272    | 111   | 92.2            |
| Kitchen Scraps <sup>c</sup> (µg/kg)                                                 |               |      |      |      |      |      | 1530 |        | 224   |                 |
| Garden Scraps <sup>c</sup> (µg/kg)                                                  |               |      |      |      |      |      | 1020 |        |       |                 |
| Other Feed (corn, grain, seed) (µg/kg)                                              |               | 11.9 | 11.9 |      |      |      |      | 80,<10 |       | < 10            |
| Calcium Supplements (µg/kg)                                                         |               | 556  | 556  |      |      |      |      | 237    | 213   |                 |
| Grit (µg/kg)                                                                        |               |      |      |      |      |      |      |        | 1770  |                 |

<sup>a</sup> Concentrations below the detection limit were substituted with one-half the detection limit in calculating mean.

<sup>b</sup> Some chicken keepers did not provide the brand name of commercial layer feed samples; those that were provided were Purina Layena, Homegrown Brand Layer Feed, Blue Seal Feed, and Lightning Tree Organic Layer Feed.

<sup>c</sup> Kitchen scraps included cabbage and acorn squash; garden scraps included callaloo and other garden vegetables.

**Table S2** Lead concentrations in chicken run soil samples (mg/kg) measured by ICP-AES and XRF. Results are strongly correlated ( $R = 0.992$ ).

Linear regressions: (a) all data  $Pb(XRF) = 0.77 Pb(ICP) + 23, R^2 = 0.98$   
 (b)  $Pb < 200$  mg/kg  $Pb(XRF) = 1.00 Pb(ICP) + 11, R^2 = 0.98$

| Henhouse ID | Lead Concentration (mg/kg) |                          |
|-------------|----------------------------|--------------------------|
|             | ICP-AES                    | XRF (mean of 3 readings) |
| Rural       | 2.45                       | 15                       |
| 1           | 24.4                       | 20                       |
| 2           | 36.2                       | 51                       |
| 3           | 43.0                       | 57                       |
| 4           | 57.0                       | 64                       |
| 5           | 49.7                       | 71                       |
| 6           | 87.6                       | 103                      |
| 7           | 184                        | 192                      |
| 8           | 290                        | 241                      |
| 9           | 438                        | 351                      |

**Table S3** Correlations between measures of lead in eggs and potentially influential variables for 10 henhouses (Spearman coefficients and p values)

| Predictor                                                    | Measure of Lead in Eggs                 |              |                                                                                           |              |
|--------------------------------------------------------------|-----------------------------------------|--------------|-------------------------------------------------------------------------------------------|--------------|
|                                                              | Detection Frequency (%) ( $F_{PbEgg}$ ) |              | Maximum Concentration in Eggs from Henhouse ( $\mu\text{g}/\text{kg}$ ) ( $Pb_{EggMax}$ ) |              |
|                                                              | Coefficient                             | p Value      | Coefficient                                                                               | p Value      |
| Lead Concentration in Soil (mg/kg)                           |                                         |              |                                                                                           |              |
| Chicken Run ( $Pb_{SoilRun}$ )                               | <b>0.83</b>                             | <b>0.003</b> | <b>0.82</b>                                                                               | <b>0.004</b> |
| Maximum in Chicken Area ( $Pb_{SoilMax}$ )                   | <b>0.74</b>                             | <b>0.014</b> | <b>0.78</b>                                                                               | <b>0.008</b> |
| Exposure-Weighted ( $Pb_{SoilExp}$ )                         | <b>0.83</b>                             | <b>0.003</b> | <b>0.88</b>                                                                               | <b>0.001</b> |
| Lead Concentration in Layer Feed ( $\mu\text{g}/\text{kg}$ ) | 0.29                                    | 0.415        | 0.23                                                                                      | 0.524        |
| Number of Chickens                                           | -0.06                                   | 0.879        | 0.03                                                                                      | 0.933        |
| Run Area ( $\text{m}^2$ )                                    | -0.48                                   | 0.162        | -0.44                                                                                     | 0.202        |
| Run Area per Chicken ( $\text{m}^2/\text{chicken}$ )         | -0.13                                   | 0.723        | -0.42                                                                                     | 0.223        |
| Fraction of Run with Bare Soil                               | -0.01                                   | 0.973        | -0.08                                                                                     | 0.837        |
| Bare Soil Area per Chicken ( $\text{m}^2/\text{chicken}$ )   | -0.14                                   | 0.709        | -0.23                                                                                     | 0.516        |
| Eggs per Laying Hen per Day                                  | -0.06                                   | 0.862        | -0.43                                                                                     | 0.214        |
| Average Chicken Residence Time (months)                      | 0.23                                    | 0.514        | 0.31                                                                                      | 0.376        |

**Table S4** Measures of lead in eggs for 10 henhouses grouped by dichotomous variables (Median, Range, and Mann-Whitney p-values)

| <u>Categorical Variable</u>                  | <u>Median (and Range) of Measure of Lead in Eggs</u> |                                            |              |                                                                                                    |
|----------------------------------------------|------------------------------------------------------|--------------------------------------------|--------------|----------------------------------------------------------------------------------------------------|
|                                              |                                                      | Detection Frequency (%)<br>( $F_{PbEgg}$ ) |              | Maximum<br>Concentration in Eggs<br>from Henhouse<br>( $\mu\text{g}/\text{kg}$ ) ( $Pb_{EggMax}$ ) |
| Feed scattered                               | No (n = 4)                                           | 7%                                         | (0% - 100%)  | 15.3 (< 10 - 58.8)                                                                                 |
|                                              | Yes (n = 6)                                          | 47%                                        | (0% - 88%)   | 29.1 (< 10 - 167)                                                                                  |
|                                              | p                                                    |                                            | 0.39         | 0.39                                                                                               |
| Calcium supplements<br>provided ( $S_{Ca}$ ) | No (n = 3)                                           | 60%                                        | (0% - 100%)  | 58.8 (< 10 - 73.2)                                                                                 |
|                                              | Yes (n = 7)                                          | 17%                                        | (0% - 88%)   | 16.1 (< 10 - 167)                                                                                  |
|                                              | p                                                    |                                            | 0.56         | 0.56                                                                                               |
| Limited access to<br>outdoors (< 24 h/d)     | No (n = 5)                                           | 33%                                        | (14% - 100%) | 25.5 (14.7 - 58.8)                                                                                 |
|                                              | Yes (n = 5)                                          | 0%                                         | (0% - 88%)   | < 10 (< 10 - 167)                                                                                  |
|                                              | p                                                    |                                            | 0.24         | 0.60                                                                                               |

**Table S5** Regression coefficients, p-values, and goodness-of-fit statistics

| Predictor variable:                                                               | <b>log(Pb<sub>SoilExp</sub>)</b> |          | <b>S<sub>Ca</sub></b> |      | Intercept |       | Model AIC <sup>a</sup> |
|-----------------------------------------------------------------------------------|----------------------------------|----------|-----------------------|------|-----------|-------|------------------------|
|                                                                                   | Coefficient                      | p        | Coefficient           | p    | Value     | p     |                        |
| <b>Response variable (Model description)</b>                                      |                                  |          |                       |      |           |       |                        |
| <b>F<sub>PbEgg</sub></b> (Generalized linear model with probit link function)     |                                  |          |                       |      |           |       |                        |
| Model 1:                                                                          | 2.57                             | 0.0016   |                       |      | -5.3      | 0.002 | 27.1                   |
| Model 2:                                                                          | 2.60                             | 0.0015   | -0.91                 | 0.07 | -4.8      | 0.003 | 24.3                   |
| <b>log(Pb<sub>EggMax</sub>)</b> (Linear regression, left-censored Tobit analysis) |                                  |          |                       |      |           |       |                        |
| Model 1:                                                                          | 0.95                             | < 0.0001 |                       |      | -0.5      | 0.26  | 10.1                   |
| Model 2:                                                                          | 0.92                             | < 0.0001 | -0.26                 | 0.09 | -0.2      | 0.52  | 8.8                    |

<sup>a</sup> AIC = Aikake information criterion, a measure of a model's goodness-of-fit. Among similar models (e.g., the two models for FPbEgg), a lower AIC value indicates a better fit.

**Table S6** Predicted fraction of eggs with lead detected (FPbEgg) and maximum lead concentration (PbEggMax) in eggs from a henhouse at three different soil concentrations

| Predictor                 | Pb <sub>SoilExp</sub> = 100 ppm |                              | Pb <sub>SoilExp</sub> = 400 ppm |                              | Pb <sub>SoilExp</sub> = 1000 ppm |                              |
|---------------------------|---------------------------------|------------------------------|---------------------------------|------------------------------|----------------------------------|------------------------------|
|                           | F <sub>PbEgg</sub>              | Pb <sub>EggMax</sub> (µg/kg) | F <sub>PbEgg</sub>              | Pb <sub>EggMax</sub> (µg/kg) | F <sub>PbEgg</sub>               | Pb <sub>EggMax</sub> (µg/kg) |
| Soil only                 | 43%                             | 26                           | 91%                             | 96                           | 99%                              | 230                          |
| Soil, S <sub>Ca</sub> = 1 | 31%                             | 22                           | 86%                             | 80                           | 98%                              | 187                          |
| Soil, S <sub>Ca</sub> = 0 | 66%                             | 41                           | 98%                             | 147                          | 100%                             | 342                          |
